# Supplementary material for: Rabies Vaccination in Dogs in Laos: Owner Knowledge and Serological Status of Dogs
Source: Pathogens. 2022 Jan 6;11(1):69. doi: 10.3390/pathogens11010069 (PMC8778959; doi:10.3390/pathogens11010069)
Supplement: Supplementary file 1 [file pathogens-11-00069-s001.zip › pathogens-1505314-supplementary.pdf]

## Questionnaire

### 1. Which district or province do you live in:

### 2. Information about the dog owner

2.1 Gender:      Female   Male

2.2 Age (years):

2.3 Education level: No education   Primary   Class 5-10   Higher secondary   Graduation and above

2.4 Are you the owner of the dog: Yes      No

2.5 Do you consume dog meat:    Yes      No

2.6 If yes, how often:      Every day      Once a week      Once a month      Less often

2.7 If no, why not:

### 3. Dog information:

3.1 Age of the dog:

3.2 Breed:

3.3 The dogs' main use: Guard      Company      Meat      Other:

3.4 Main caregiver:      Adult in family   Child in family   Other:

3.5 Living situation: Only outside loose      Only outside in a leash      Only outside loose but in a fenced area  
Only indoor      Booth indoor and outside, when outside in a leash  
Booth indoor and outside, when outside loose

3.6 How did you come to own the dog: Bought      A gift      Puppy from previous dog      Other:

### 4. Health status of the dog:

4.1 Has the dog ever gotten vaccinated: Yes      No (continue to 4.5)      Don't know

4.2 How often does the dog get vaccinated:      One time      1 time/year      1 time/3 years      Other:

4.3 Against which illness:

4.4 How long ago was the dog vaccinated:

4.5 History of illness:      Bite wounds      Vomiting/diarrhoea      Parasites      Lameness  
Other:

### 5. General questions:

5.1 Do you know if dogs can transmit diseases to humans: Yes      No

5.2 If yes, which illness do you know of that dogs can transmit to humans:

**6. Rabies:**

6.1 Do you know what rabies is: Yes No

6.2 Do you know how rabies is transmitted: Yes No

6.3 If yes, how is rabies transmitted: Mosquitoes Faeces Bites Blood contact Food  
Contact with dog saliva

6.4 Who can get rabies: Humans Dogs Cats Cattle Birds All animals Don't know

6.5 Symptoms of rabies: Fever Vomiting/diarrhoea Aggressiveness Salivation Abortion  
Staggering Difficulty breathing Weight loss Fatigue Skin lesions Don't know

6.6 Can rabies be fatal: Yes No Don't know

6.7 Do you know if there is a vaccine against rabies: Yes No

6.8 Where does your knowledge about rabies come from: School Government rabies vaccination  
campaigns Newspaper/TV/radio Old generation/friend Other:
